# Supplementary material for: Complications in complexation kinetics for lanthanides with DTPA using dye probe molecules in aqueous solution
Source: Royal Society of Chemistry journal article supplement (doi:10.1039/c7ra04755j), 2017-01-01
Supplement: c7ra04755j1.pdf [file c7ra04755j1.pdf]

## Supplemental information

### *Metal to dye complex ratio for europium and xylenol orange*

Prior to measuring the DTPA-metal ion complexation rate constants individual UV-visible absorption spectra for DTPA, metal ions, and the metal-Xylenol Orange complex were measured. Typical data are shown for Eu(III) in Figure 1. At the concentrations studied, it was found that both free DTPA and metal-complexed DTPA had no measurable absorbance in the UV-Visible absorbance range. It was also seen that the maximum absorbance difference between the free dye and the metal-complexed dye occurred at 568 nm.

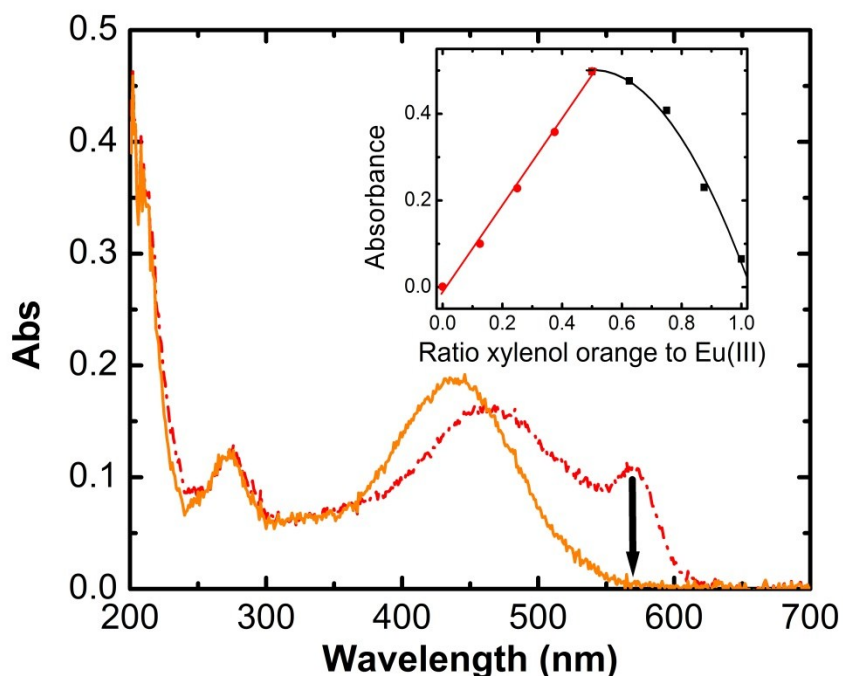

**SI Figure 1.** Differences in the absorbance spectra of Xylenol Orange dye (orange solid) and the dye-Eu(III) metal complex (red dashed). Arrow denotes the measured change in absorbance between the dye and dye-metal complex monitored in kinetics experiments. Inset: Determination of the Eu(III) to xylenol orange ratio. From the peak absorbance value (intersection of two fitted lines) a ratio of metal to xylenol orange of 1:1 was calculated.

The stoichiometry of the dye-metal complex was first determined for Eu(III) by plotting the complex absorbance at 568 nm against varying ratios of metal:dye concentrations. From these data (shown in Figure 1, Inset) the stoichiometry was determined to be 1:1 under the conditions studied (pH = 3.6). However, for conditions with excess dye compared to metal, the ratio is not entirely linear, indicating that a higher order complex (such as 1:2) can partly form (equal concentrations and excess metal remained linear and thereby 1:1 complexed), this was

also observed by Kornev *et al.*<sup>29</sup> for samarium. Measured metal-xylene orange absorption coefficients at 568 nm and these conditions are also listed in Table 1.

**SI Table 1.** Molar absorption coefficients for M-XO complexes at  $\lambda = 568$  nm and pH  $3.6 \pm 0.1$ .

| Metal Ion | $10^4 \epsilon$ ( $M^{-1}cm^{-1}$ ) |
|-----------|-------------------------------------|
| Lu(III)   | 1.12                                |
| Er(III)   | 1.17                                |
| Ho(III)   | 1.16                                |
| Tb(III)   | 1.18                                |
| Eu(III)   | 1.41                                |

In addition to the specific complexation ( $k_1$ ) and decomplexation ( $k_{-1}$ ) rate constants for the Xylene Orange dye we also performed some temperature-dependent measurements for the Lu(III) and Eu(III) reaction with the DTPA-lanthanide-dye system, summarized in Table 2. The measured activation energies were  $86 \pm 5$  and  $74 \pm 10$  kJ mol<sup>-1</sup> respectively, similar and within experimental error. Additional temperature values for rate constants in the dye-lanthanide-DTPA system are also included in Table 2. The values were determined using pseudo first order approximations after fitting a double exponential function to the original data.

**SI Table 2.** Complexation ( $k_1$ ), decomplexation ( $k_{-1}$ ) and second exponential decay ( $k_2$ ) rate constants determined for various lanthanide ions with xylene orange and DTPA. (n.d. – could not be reliably determined).

| Metal | Temp. | $k_1$               | $k_{-1}$        | $k_2$             |
|-------|-------|---------------------|-----------------|-------------------|
|       | K     | $10^3 M^{-1}s^{-1}$ | $s^{-1}$        | $s^{-1}$          |
| Lu    | 288.1 | $3.50 \pm 0.53$     | $6.1 \pm 0.5$   | n.d.              |
|       | 292.1 | $5.30 \pm 0.85$     | $8.0 \pm 0.9$   | n.d.              |
|       | 300.3 | $13.3 \pm 0.5$      | $9.0 \pm 0.5$   | n.d.              |
|       | 303.6 | $22.4 \pm 0.6$      | $9.9 \pm 0.4$   | n.d.              |
| Er    | 296.2 | $10.2 \pm 0.4$      | $9.2 \pm 2.6$   | $0.004 \pm 0.002$ |
| Ho    | 296.2 | $11.6 \pm 0.5$      | $12.9 \pm 2.9$  | $0.044 \pm 0.002$ |
| Tb    | 296.3 | $28.3 \pm 3.4$      | $31.4 \pm 2.3$  | $0.87 \pm 0.09$   |
| Eu    | 285.2 | $11.9 \pm 3.2$      | $59.0 \pm 2.7$  | n.d.              |
|       | 290.2 | $23.8 \pm 1.6$      | $95.5 \pm 1.5$  | n.d.              |
|       | 293.9 | $26.2 \pm 2.5$      | $131.8 \pm 1.3$ | n.d.              |
|       | 299.2 | $54.8 \pm 6.4$      | $154.0 \pm 5.4$ | $7.82 \pm 0.34$   |
